CORRECTION

# Correction: All is not loss: Plant biodiversity in the anthropocene

Erle C. Ellis, Erica C. Antill, Holger Kreft

There is an error in affiliation 1 for authors Erle C. Ellis and Erica C. Antill. The correct affiliation 1 is: Department of Geography & Environmental Systems, University of Maryland, Baltimore County, Baltimore, Maryland, United States of America.

## Reference

1. Ellis EC, Antill EC, Kreft H. All is not loss: plant biodiversity in the anthropocene. PLoS One. 2012;7(1):e30535. <https://doi.org/10.1371/journal.pone.0030535> PMID: [22272360](https://pubmed.ncbi.nlm.nih.gov/22272360/)

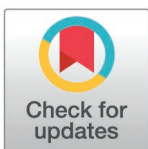

## OPEN ACCESS

**Citation:** Ellis EC, Antill EC, Kreft H (2025) Correction: All is not loss: Plant biodiversity in the anthropocene. PLoS One 20(7): e0327912. <https://doi.org/10.1371/journal.pone.0327912>

**Published:** July 9, 2025

**Copyright:** © 2025 Ellis et al. This is an open access article distributed under the terms of the [Creative Commons Attribution License](https://creativecommons.org/licenses/by/4.0/), which permits unrestricted use, distribution, and reproduction in any medium, provided the original author and source are credited.
